# Supplementary material
Source: PubMed Central journal article supplement (PMC2547014)
Supplement: supp_28_19_6044__1.pdf [file supp_28_19_6044__1.pdf]

## Supplementary Table SI. Primers used in this study

| Primer                      | Sequence                              |
|-----------------------------|---------------------------------------|
| Yeast two-hybrid constructs |                                       |
| dim-2 <sup>1-366</sup>      |                                       |
| #872                        | 5'-CGGGATCCATGGATTCCGCCAGATCGCAGC-3'  |
| #873                        | 5'-AACTGCAGGCCATTGATCTCCTTCCAGA-3'    |
| dim-2 <sup>290-566</sup>    |                                       |
| #874                        | 5'-GGAATTCCTGGCAGGGGAGGACGCCG-3'      |
| #875                        | 5'-CCATCGATGCAGTATAGATCCATTCCCCT-3'   |
| dim-2 <sup>431-847</sup>    |                                       |
| #871                        | 5'-CGGGATCCGTTTGAAGTGCATCTCG-3'       |
| #876                        | 5'-GGAATCCCTTTGGATTGCAGACCTCGG-3'     |
| dim-2 <sup>2-74</sup>       |                                       |
| #1519                       | 5'-CGGGATCCGATTCGCCAGATCGCAGCCA-3'    |
| #1524                       | 5'-AACTGCAGTCAAGGGTCGTCGGGGCTTGGGG-3' |
| dim-2 <sup>75-220</sup>     |                                       |
| #1520                       | 5'-CGGGATCCCAACTTCAACTTCAACTCGA-3'    |
| #1526                       | 5'-AACTGCAGTCACTTGTCGTGCAGCACCTTGG-3' |
| dim-2 <sup>75-147</sup>     |                                       |
| #1520                       | 5'-CGGGATCCCAACTTCAACTTCAACTCGA-3'    |
| #1525                       | 5'-AACTGCAGTCATTGAAATGTCGACCTTGGGT-3' |
| dim-2 <sup>148-220</sup>    |                                       |
| #1521                       | 5'-CGGGATCCAGAATCGATGAAAACGATAA-3'    |
| #1526                       | 5'-AACTGCAGTCACTTGTCGTGCAGCACCTTGG-3' |
| dim-2 <sup>221-366</sup>    |                                       |
| #1522                       | 5'-CGGGATCCTATTACTTTGACGGAGTGCT-3'    |
| #1528                       | 5'-AACTGCAGTCAGCCATTGATCTCCTTCCAGA-3' |
| HP1 <sup>2-266</sup>        |                                       |
| #1510                       | 5'-CGGGATCCCCGTACGATCCATCGGCTCT-3'    |
| #1516                       | 5'-CCATCGATCTATTGCGAGACGCTGCCCT-3'    |
| HP1 <sup>2-210</sup>        |                                       |
| #1510                       | 5'-CGGGATCCCCGTACGATCCATCGGCTCT-3'    |
| #1514                       | 5'-CCATCGATCATGTGTCCTCATCTTCGCAGG-3'  |
| HP1 <sup>156-266</sup>      |                                       |
| #1511                       | 5'-CGGGATCCTCCGGCACTCCCCAAGCAAG-3'    |
| #1516                       | 5'-CCATCGATCTATTGCGAGACGCTGCCCT-3'    |
| HP1 <sup>191-266</sup>      |                                       |

#1512 5'-CGGGATCCCCAGCGGGAAGCTGGGAAGA-3'  
#1516 5'-CCATCGATCTATTGCGAGACGCTGCCCT-3'

HP1<sup>221-266</sup>

#1513 5'-CGGGATCCAATGGCCACAAGACCCAGCA-3'  
#1516 5'-CCATCGATCTATTGCGAGACGCTGCCCT-3'

dim-5

#1473 5'-GGAATTTCGAGAAAGCGTTCCGCCCTCA-3'  
#1476 5'-CGGGATCCTTACCACAGATAGCCTCTGC-3'

Mutagenesis

dim-2<sup>IVL/AAA</sup>

#1532 5'-GTAGTAAGCACGCTACGGCCGATGCACCAGTATCGAC-3'  
#1533 5'-GTCGATACTGGTGCATCGGCCGTAGCGTGCTTACTAC-3'

dim-2<sup>PSL/AAA</sup>

#1534 5'-GGTCGATCTAGCAGTGGCCACCGCGATAAACCCAAG-3'  
#1535 5'-CTTGGGTTTATCGCGGTGGCCACTGCTAGATCGACC-3'

HP1<sup>Y244E</sup>

#1544 5'-GATGCTCCAATTCGAAGAGCGACATGTG-3'  
#1545 5'-CACATGTCGCTCTTCGAATTGGAGCATC-3'

HP1<sup>I250E</sup>

#1568 5'-GACATGTGAGGGAGATCAAGAGGG-3'  
#1569 5'-CCCTCTTGATCTCCCTCACATGTC-3'

Gene disruption of *dap-1*

*hph* gene

#1632 5'-CCGTCGACAGAAGATGATATTGAAGGAGC-3'  
#1633 5'-AGCTGACATCGACACCAACG-3'

dap-1 5'

#1745 5'-GTAACGCCAGGGTTTTCCAGTCACGACGAGGTAGTGTGATAGTGACGG-3'  
#1757 5'-ACCGGGATCCACTTAACGTTACTGAAATCAGCTATCGAAGATCAGACGG-3'

dap-1 3'

#1769 5'-GCTCCTTCAATATCATCTTCTGTGACGGATGTGATGGATGCGAATGGG-3'  
#1781 5'-GCGATAACAATTTACACAGGAAACAGCACTCATGAACCCACTTTCGG-3'

Knock-in

dim-2 5'

#1988 5'-GAGGTCGACGGTATCGATAAGCTTGATATATCAAGGCCTGGAACAACGG-3'  
#2013 5'-CCTCCGCCTCCGCCTCCGCCCTCCGCCCAACTTGACAATCGTCATGC-3'

dim-2 3'

#1989 5'-TGCTATACGAAGTTATGGATCCGAGCTCGTGCGACGAGGTAACGCCATG-3'  
#1990 5'-ACCGCGGTGGCGGCCGCTCTAGAAGTACAGCAAGACCGGCAACCATCTG-3'

dim-5 5'

#1992 5'-GAGGTCGACGGTATCGATAAGCTTGATATCATCCAAACAAAAGTCGAGG-3'  
#1993 5'-CCTCCGCCTCCGCCTCCGCCGCCTCCGCCCCACAGATAGCCTCTGCACTTG-3'

dim-5 3'

#1994 5'-TGCTATACGAAGTTATGGATCCGAGCTCGTGGGGGAAGATGTAACTCAC-3'  
#1995 5'-ACCGCGGTGGCGGCCGCTCTAGAAGTAGTATCATGGCAACCTAGCCAGG-3'

HP1 5'

#1996 5'-GAGGTCGACGGTATCGATAAGCTTGATATTACAGCGCAACACTTCGTCG-3'  
#1997 5'-CCTCCGCCTCCGCCTCCGCCGCCTCCGCCTTGCAGACGCTGCCCTCGC-3'

HP1 3'

#1998 5'-TGCTATACGAAGTTATGGATCCGAGCTCGAAGACCGAGGTAGCACTTCTC-3'  
#1999 5'-ACCGCGGTGGCGGCCGCTCTAGAAGTAGTGTGATGTGCCGAATTCGCTC-3'

*his-3* targetting vectors

dim-2 promoter

#1970 5'-ATAAGAATGCGGCCGCAGTCCGCAACAGGAAG-3'  
#2087 5'-GCTCTAGATTGGCTGATAACGAAGTAGC-3'

dim-2 ORF

#1517 5'-GCTCTAGATCGTTATCAGCCAAGCCATG-3'  
#1518 5'-CGTTAATTAACAACCTTGACAATCGTCATG-3'

HP1 promoter

#2066 5'-ATAAGAATGCGGCCGCACACCTCGCTGGGTCTCAGC-3'  
#2067 5'-CGGGATCCACTTGTACAGCTCGTCCATGC-3'

ChIP

hH4-1 (425 bp)

#1924 5'-AACCACCGAAACCGTAGAGGGTAC-3'  
#1925 5'-ATCGCCGACACCGTGTGTTGTAAC-3'

8:A6 (303 bp)

#1823 5'-GGATGGCGGATCCTCAAAAATA-3'  
#1824 5'-TAACCGCCGCTTTTTAAAATTAGGA-3'

8:F10 (317 bp)

#1827 5'-GTAACGCAAATTCTAAAATTGCAATAC-3'  
#1828 5'-CTTAGTAATTAATTTAATACGTGCGCC-3'

8:G3 (231 bp)

#1866 5'-CGTAGAGAAGGGAAGTAGTAGAAGG-3'  
#1867 5'-GCACAATACGAAGTCACTTTTCACC-3'

Ψ63 (273 bp)

#1909 5'-ACAATGCCTTGCTAGCCGAG-3'  
#1916 5'-CCTTCCTTTTACCTCTAGGCTTC-3'

---

**Supplementary Table SII.** *Neurospora crassa* strains used in this study

| Strain | Genotype                                                                                                                                          | Reference                   |
|--------|---------------------------------------------------------------------------------------------------------------------------------------------------|-----------------------------|
| N150   | <i>mat A</i>                                                                                                                                      | FGSC#2489                   |
| N623   | <i>mat A his-3</i>                                                                                                                                | FGSC#6103                   |
| N1877  | <i>mat a his-3; Δdim-2::hph<sup>+</sup></i>                                                                                                       | Kouzminova & Selker (2001)  |
| N2264  | <i>mat a his-3; dim-5 leu-2 pan-1</i>                                                                                                             | Tamaru & Selker (2001)      |
| N2556  | <i>mat a his-3; hpo<sup>RIP2</sup></i>                                                                                                            | Freitag <i>et al</i> (2004) |
| N2930  | <i>mat A his-3 Δmus-52::bar<sup>+</sup></i>                                                                                                       | this study                  |
| N3315  | <i>mat a his-3; dim-5-3xHA::loxP::hph<sup>+</sup>::loxP</i>                                                                                       | this study                  |
| N3316  | <i>mat A his-3; dim-5-3xHA::loxP::hph<sup>+</sup>::loxP</i>                                                                                       | this study                  |
| N3319  | <i>mat a his-3; hpo-3xFLAG::loxP::hph<sup>+</sup>::loxP</i>                                                                                       | this study                  |
| N3320  | <i>mat A his-3; hpo-3xFLAG::loxP::hph<sup>+</sup>::loxP</i>                                                                                       | this study                  |
| N3321  | <i>mat a his-3; hpo-gfp::loxP::hph<sup>+</sup>::loxP</i>                                                                                          | this study                  |
| N3322  | <i>mat A his-3; hpo-gfp::loxP::hph<sup>+</sup>::loxP</i>                                                                                          | this study                  |
| N3323  | <i>mat a his-3; dim-2-3xFLAG::loxP::hph<sup>+</sup>::loxP</i>                                                                                     | this study                  |
| N3324  | <i>mat A his-3; dim-2-3xFLAG::loxP::hph<sup>+</sup>::loxP</i>                                                                                     | this study                  |
| N3395  | <i>mat a his-3; hpo<sup>RIP2</sup>; dim-2-3xFLAG::loxP::hph<sup>+</sup>::loxP</i>                                                                 | this study                  |
| N3396  | <i>mat a his-3; Δdim-2::hph<sup>+</sup>; hpo-gfp::loxP::hph<sup>+</sup>::loxP</i>                                                                 | this study                  |
| N3415  | <i>mat a his-3<sup>+</sup>::P<sub>dim-2</sub>::dim-2-3xFLAG; Δdim-2::hph<sup>+</sup>; hpo-gfp::loxP::hph<sup>+</sup>::loxP</i>                    | this study                  |
| N3416  | <i>mat a his-3<sup>+</sup>::P<sub>dim-2</sub>::dim-2<sup>IVL/AAA</sup>-3xFLAG; Δdim-2::hph<sup>+</sup>; hpo-gfp::loxP::hph<sup>+</sup>::loxP</i>  | this study                  |
| N3417  | <i>mat a his-3<sup>+</sup>::P<sub>dim-2</sub>::dim-2<sup>PSL/AAA</sup>-3xFLAG; Δdim-2::hph<sup>+</sup>; hpo-gfp::loxP::hph<sup>+</sup>::loxP</i>  | this study                  |
| N3418  | <i>mat a his-3<sup>+</sup>::P<sub>hpo</sub>::hpo-gfp; hpo<sup>RIP2</sup>; dim-2-3xFLAG::loxP::hph<sup>+</sup>::loxP</i>                           | this study                  |
| N3419  | <i>mat a his-3<sup>+</sup>::P<sub>hpo</sub>::hpo<sup>Y244E</sup>-gfp; hpo<sup>RIP2</sup>; dim-2-3xFLAG::loxP::hph<sup>+</sup>::loxP</i>           | this study                  |
| N3420  | <i>mat a his-3<sup>+</sup>::P<sub>hpo</sub>::hpo<sup>I250E</sup>-gfp; hpo<sup>RIP2</sup>; dim-2-3xFLAG::loxP::hph<sup>+</sup>::loxP</i>           | this study                  |
| N3436  | <i>mat a his-3<sup>+</sup>::P<sub>dim-2</sub>::dim-2-3xFLAG; Δdim-2::hph<sup>+</sup>; hpo-gfp::loxP::hph<sup>+</sup>::loxP; dim-5 leu-2 pan-1</i> | this study                  |
| N3451  | <i>mat a his-3; dim-2-3xFLAG::loxP::hph<sup>+</sup>::loxP; dim-5-3xHA::loxP::hph<sup>+</sup>::loxP</i>                                            | this study                  |
| N3452  | <i>mat a his-3; hpo-3xFLAG::loxP::hph<sup>+</sup>::loxP; dim-2::hph<sup>+</sup>; dim-5-3xHA::loxP::hph<sup>+</sup>::loxP</i>                      | this study                  |
